# Supplementary material
Source: PubMed Central journal article supplement (PMC4904745)
Supplement: EXCLI-12-943-s-001.pdf [file EXCLI-12-943-s-001.pdf]

**Supplementary table: Raw data of the tested parameters in healthy, HCV control and HCV treated patients**

| Group   | Patient no. | Age | Viral load (U/L) | AFP (ng/ml) | ALT (U/L) | AST (U/L) | LDH (U/L) | ALP (U/L) | γGT (U/L) | Total Bilirubin (mg/dl) | Albumin (g/dl) | PT (Sec) | PC %  | INR  |
|---------|-------------|-----|------------------|-------------|-----------|-----------|-----------|-----------|-----------|-------------------------|----------------|----------|-------|------|
| Healthy | 1           | 39  | 0                | 1           | 18        | 21        | 247       | 81        | 23        | 0.1                     | 4.1            | 12.4     | 100.0 | 1.00 |
|         | 2           | 41  | 0                | 1           | 25        | 23        | 218       | 87        | 18        | 0.2                     | 4.7            | 13       | 94.2  | 1.06 |
|         | 3           | 54  | 0                | 2           | 18        | 24        | 318       | 59        | 14        | 0.4                     | 4.3            | 13       | 94.2  | 1.06 |
|         | 4           | 56  | 0                | 2           | 15        | 26        | 238       | 61        | 10        | 0.2                     | 4.9            | 13.1     | 93.3  | 1.07 |
|         | 5           | 42  | 0                | 2           | 13        | 17        | 210       | 63        | 8         | 0.1                     | 4.5            | 13.2     | 92.4  | 1.08 |
|         | 6           | 44  | 0                | 2           | 15        | 24        | 249       | 60        | 13        | 0.4                     | 4.6            | 13       | 94.2  | 1.06 |
|         | 7           | 30  | 0                | 2.4         | 25        | 25        | 218       | 87        | 18        | 0.3                     | 4.7            | 12.9     | 95.1  | 1.05 |
|         | 8           | 53  | 0                | 1.8         | 18        | 27        | 211       | 59        | 13        | 0.1                     | 4.3            | 12.8     | 96.1  | 1.04 |
|         | 9           | 48  | 0                | 1           | 15        | 26        | 231       | 61        | 11        | 0.2                     | 4.8            | 13.1     | 93.3  | 1.07 |
|         | 10          | 39  | 0                | 1           | 29        | 21        | 300       | 81        | 22        | 0.1                     | 5              | 12.6     | 98.0  | 1.02 |
|         | 11          | 53  | 0                | 1.8         | 28        | 21        | 289       | 82        | 23        | 0.2                     | 4.4            | 12.6     | 100.0 | 1.00 |
|         | 12          | 48  | 0                | 2.2         | 32        | 21        | 301       | 81        | 24        | 0.1                     | 4.1            | 12.6     | 98.0  | 1.02 |
|         | 13          | 50  | 0                | 1           | 30        | 26        | 238       | 62        | 10        | 0.2                     | 4.8            | 13.1     | 93.3  | 1.07 |
|         | 14          | 47  | 0                | 2           | 27        | 29        | 260       | 79        | 12        | 0.4                     | 5.2            | 12.9     | 95.1  | 1.05 |
|         | 15          | 48  | 0                | 1           | 18        | 19        | 301       | 80        | 23        | 0.1                     | 4.1            | 12.6     | 98.0  | 1.02 |

| Group       | Patient no. | Age | Viral load (U/L) | AFP (ng/ml) | ALT (U/L) | AST (U/L) | LDH (U/L) | ALP (U/L) | γGT (U/L) | Total Bilirubin (mg/dl) | Albumin (g/dl) | PT (Sec) | PC % | INR  |
|-------------|-------------|-----|------------------|-------------|-----------|-----------|-----------|-----------|-----------|-------------------------|----------------|----------|------|------|
| HCV Control | 1           | 39  | 190              | 8.9         | 40        | 38        | 510       | 120       | 45        | 0.9                     | 3.3            | 15.3     | 76.7 | 1.30 |
|             | 2           | 39  | 448              | 26.9        | 69        | 66        | 620       | 116       | 121       | 1.5                     | 3.6            | 14.5     | 82.1 | 1.22 |
|             | 3           | 44  | 84               | 2.1         | 48        | 40        | 502       | 75        | 32        | 0.7                     | 4              | 13.3     | 91.5 | 1.09 |
|             | 4           | 32  | 890              | 13          | 54        | 52        | 536       | 81        | 19        | 0.5                     | 3.3            | 13.9     | 86.6 | 1.15 |
|             | 5           | 52  | 15               | 2.3         | 34        | 30        | 359       | 76        | 19        | 0.4                     | 3.9            | 13.4     | 90.7 | 1.10 |
|             | 6           | 33  | 200              | 2           | 46        | 55        | 450       | 100       | 38        | 0.6                     | 3.8            | 14       | 85.8 | 1.17 |
|             | 7           | 42  | 350              | 7           | 48        | 39        | 450       | 109       | 39        | 0.8                     | 3              | 13       | 94.2 | 1.06 |
|             | 8           | 46  | 600              | 8           | 40        | 41        | 403       | 112       | 42        | 0.6                     | 3.5            | 13.4     | 90.7 | 1.10 |
|             | 9           | 46  | 850              | 12.6        | 57        | 67        | 369       | 146       | 45        | 1                       | 4.3            | 13       | 94.2 | 1.06 |
|             | 10          | 52  | 421              | 8.1         | 71        | 41        | 456       | 178       | 78        | 1.2                     | 3.4            | 13.3     | 91.5 | 1.09 |
|             | 11          | 42  | 601              | 9.1         | 29        | 30        | 222       | 171       | 32        | 0.5                     | 4.1            | 12.6     | 98.0 | 1.02 |
|             | 12          | 55  | 50               | 8.5         | 99        | 80        | 543       | 134       | 153       | 1.2                     | 3.5            | 14.6     | 81.4 | 1.23 |
|             | 13          | 42  | 99               | 11          | 60        | 61        | 580       | 92        | 111       | 1                       | 3.9            | 14.2     | 84.3 | 1.19 |
|             | 14          | 41  | 877              | 9           | 48        | 41        | 410       | 120       | 39        | 0.8                     | 3.9            | 13.4     | 90.7 | 1.10 |
|             | 15          | 46  | 180              | 7           | 80        | 60        | 401       | 55        | 80        | 0.8                     | 3.9            | 13.4     | 90.7 | 1.10 |

| Group   | Patient no. | Age | Viral load (U/L) | AFP (ng/ml) | ALT (U/L) | AST (U/L) | LDH (U/L) | ALP (U/L) | γGT (U/L) | Total Bilirubin (mg/dl) | Albumin (g/dl) | PT (Sec) | PC %  | INR  |
|---------|-------------|-----|------------------|-------------|-----------|-----------|-----------|-----------|-----------|-------------------------|----------------|----------|-------|------|
| HCV + N | 1           | 42  | 44               | 5.1         | 30        | 32        | 470       | 96        | 38        | 0.2                     | 3.8            | 13       | 94.2  | 1.06 |
|         | 2           | 55  | 310              | 16.2        | 43        | 51        | 401       | 87        | 50        | 0.9                     | 4.1            | 12.5     | 99.0  | 1.01 |
|         | 3           | 42  | 51               | 8.3         | 39        | 31        | 356       | 66        | 15        | 0.3                     | 4.2            | 10.4     | 124.8 | 0.80 |
|         | 4           | 54  | 312              | 6.8         | 45        | 46        | 279       | 65        | 16        | 0.1                     | 3.9            | 12.7     | 97.0  | 1.03 |
|         | 5           | 33  | 7                | 4.7         | 29        | 25        | 409       | 90        | 14        | 0.3                     | 5.1            | 11.2     | 113.7 | 0.88 |
|         | 6           | 55  | 78               | 12.3        | 39        | 40        | 401       | 116       | 50        | 0.9                     | 4              | 12.5     | 99.0  | 1.01 |
|         | 7           | 54  | 230              | 4.3         | 41        | 41        | 289       | 78        | 29        | 0.1                     | 4.1            | 12.7     | 97.0  | 1.03 |
|         | 8           | 33  | 145              | 6.3         | 29        | 24        | 410       | 60        | 14        | 0.3                     | 4.8            | 12.4     | 100.0 | 1.00 |
|         | 9           | 55  | 203              | 5           | 38        | 44        | 401       | 80        | 49        | 0.9                     | 3.9            | 12.5     | 99.0  | 1.01 |
|         | 10          | 42  | 102              | 4           | 50        | 46        | 245       | 86        | 40        | 0.3                     | 4.2            | 10.4     | 124.8 | 0.80 |
|         | 11          | 40  | 89               | 5.2         | 49        | 48        | 239       | 70        | 16        | 0.3                     | 4.3            | 12.5     | 99.0  | 1.01 |
|         | 12          | 39  | 180              | 4.2         | 40        | 30        | 320       | 52        | 33        | 0.1                     | 4.7            | 10.4     | 124.8 | 0.80 |
|         | 13          | 40  | 50               | 1.9         | 44        | 40        | 378       | 54        | 31        | 0.2                     | 4.4            | 12.3     | 101.0 | 0.99 |
|         | 14          | 42  | 300              | 6.2         | 42        | 33        | 240       | 51        | 15        | 0.3                     | 4.2            | 12.2     | 102.1 | 0.98 |
|         | 15          | 33  | 76               | 2.1         | 34        | 24        | 258       | 50        | 19        | 0.3                     | 5.1            | 11.2     | 113.7 | 0.88 |

| Group   | Patient no. | Age | Viral load (U/L) | AFP (ng/ml) | ALT (U/L) | AST (U/L) | LDH (U/L) | ALP (U/L) | γGT (U/L) | Total Bilirubin (mg/dl) | Albumin (g/dl) | PT (Sec) | PC %  | INR   |      |
|---------|-------------|-----|------------------|-------------|-----------|-----------|-----------|-----------|-----------|-------------------------|----------------|----------|-------|-------|------|
| HCV + G | 1           | 42  | 65               | 14          | 64        | 32        | 402       | 109       | 70        | 1.1                     | 2.9            | 14.5     | 82.1  | 1.22  |      |
|         | 2           | 46  | 120              | 6           | 49        | 31        | 350       | 69        | 20        | 0.5                     | 4.3            | 13.1     | 93.3  | 1.07  |      |
|         | 3           | 42  | 410              | 5.2         | 38        | 50        | 313       | 94        | 30        | 0.5                     | 4.3            | 11.9     | 105.3 | 0.95  |      |
|         | 4           | 42  | 320              | 4.3         | 16        | 43        | 318       | 66        | 11        | 0.4                     | 4.3            | 11.3     | 112.4 | 0.89  |      |
|         | 5           | 46  | 34               | 4           | 44        | 39        | 350       | 69        | 45        | 0.5                     | 4.6            | 13.1     | 93.3  | 1.07  |      |
|         | 6           | 32  | 120              | 5.8         | 42        | 29        | 301       | 70        | 41        | 0.4                     | 4.6            | 13       | 94.2  | 1.06  |      |
|         | 7           | 42  | 211              | 2           | 30        | 41        | 318       | 66        | 40        | 0.3                     | 4.3            | 11.3     | 112.4 | 0.89  |      |
|         | 8           | 44  | 115              | 3           | 40        | 31        | 301       | 70        | 34        | 0.4                     | 4.6            | 13       | 94.2  | 1.06  |      |
|         | 9           | 38  | 105              | 2.1         | 39        | 23        | 318       | 66        | 34        | 0.4                     | 4.3            | 11.3     | 112.4 | 0.89  |      |
|         | 10          | 44  | 98               | 1.8         | 40        | 40        | 301       | 70        | 30        | 0.4                     | 4.6            | 13       | 94.2  | 1.06  |      |
|         | 11          | 50  | 169              | 3.3         | 40        | 29        | 312       | 89        | 31        | 0.5                     | 4              | 13       | 94.2  | 1.06  |      |
|         | 12          | 48  | 125              | 4.3         | 38        | 30        | 300       | 80        | 16        | 0.3                     | 4.2            | 12.8     | 96.1  | 1.04  |      |
|         | 13          | 47  | 320              | 5.2         | 36        | 40        | 321       | 76        | 76        | 20                      | 0.4            | 4.7      | 12.6  | 98.0  | 1.02 |
|         | 14          | 42  | 53               | 3.4         | 38        | 43        | 313       | 94        | 94        | 18                      | 0.5            | 4.3      | 11.9  | 105.3 | 0.95 |
|         | 15          | 42  | 17               | 4.3         | 28        | 37        | 318       | 66        | 66        | 32                      | 0.3            | 4.3      | 11.6  | 108.8 | 0.92 |

| Group    | Patient no. | Age | Viral load (U/L) | AFP (ng/ml) | ALT (U/L) | AST (U/L) | LDH (U/L) | ALP (U/L) | γGT (U/L) | Total Bilirubin (mg/dl) | Albumin (g/dl) | PT (Sec) | PC %  | INR  |
|----------|-------------|-----|------------------|-------------|-----------|-----------|-----------|-----------|-----------|-------------------------|----------------|----------|-------|------|
| HCV + NG | 1           | 49  | 122              | 4           | 30        | 43        | 234       | 78        | 39        | 0.3                     | 4.8            | 11.8     | 106.4 | 0.94 |
|          | 2           | 33  | 186              | 5.2         | 38        | 32        | 420       | 98        | 20        | 0.6                     | 4.4            | 12.9     | 95.1  | 1.05 |
|          | 3           | 52  | 11               | 7           | 48        | 27        | 400       | 78        | 40        | 0.4                     | 3.8            | 12.1     | 103.1 | 0.97 |
|          | 4           | 46  | 121              | 4           | 41        | 34        | 269       | 80        | 34        | 0.8                     | 4.6            | 12.3     | 101.0 | 0.99 |
|          | 5           | 35  | 77               | 4           | 39        | 45        | 300       | 61        | 13        | 0.4                     | 4.5            | 12.6     | 98.0  | 1.02 |
|          | 6           | 56  | 105              | 6.1         | 26        | 33        | 212       | 70        | 15        | 0.2                     | 4.5            | 11.7     | 107.6 | 0.93 |
|          | 7           | 47  | 112              | 4.5         | 38        | 40        | 290       | 75        | 34        | 0.4                     | 4.8            | 10.9     | 117.6 | 0.85 |
|          | 8           | 40  | 70               | 2.3         | 33        | 38        | 305       | 44        | 27        | 0.1                     | 4.4            | 12.3     | 101.0 | 0.99 |
|          | 9           | 44  | 102              | 5.3         | 22        | 30        | 301       | 55        | 13        | 0.2                     | 4.9            | 11.6     | 108.8 | 0.92 |
|          | 10          | 55  | 89               | 5           | 40        | 34        | 301       | 71        | 31        | 0.2                     | 4.3            | 12.6     | 98.0  | 1.02 |
|          | 11          | 33  | 190              | 1.2         | 38        | 33        | 321       | 34        | 20        | 0.8                     | 4.4            | 12.9     | 95.1  | 1.05 |
|          | 12          | 49  | 103              | 1           | 39        | 23        | 256       | 67        | 30        | 0.3                     | 4.8            | 11.8     | 106.4 | 0.94 |
|          | 13          | 52  | 11               | 5.3         | 45        | 21        | 235       | 68        | 25        | 0.4                     | 3.8            | 12.1     | 103.1 | 0.97 |
|          | 14          | 46  | 123              | 5           | 41        | 30        | 269       | 89        | 34        | 0.8                     | 4.6            | 12.3     | 101.0 | 0.99 |
|          | 15          | 35  | 122              | 4.6         | 34        | 36        | 300       | 50        | 13        | 0.4                     | 4.5            | 12.6     | 98.0  | 1.02 |
